# Supplementary material
Source: HighWire-hosted journal article supplement (https://erj.ersjournals.com/content/51/5/1702189)
Supplement: inline-supplementary-material-1 [file inline-supplementary-material-1.pdf]

### Supplementary table S1:

Patient characteristic of the 166 patients stratified for the diagnosis of culture-confirmed or culture-negative = clinically diagnosed and treated tuberculosis (n=88) and patients, with the initial suspicion but an alternative diagnosis at discharge (n=78).

n: number, IQR: interquartile range, f: female, m : male, TB: tuberculosis, n/a: not applicable, NTM: non-tuberculous mycobacteria.

\*HIV-coinfection was detected in 1/66 sputum culture-confirmed and 1/15 BAL culture-confirmed patients with pulmonary tuberculosis

|                                          | TB                                      | Non-TB                                                                                                                                                                                                                                                                                                                                                                                                        |
|------------------------------------------|-----------------------------------------|---------------------------------------------------------------------------------------------------------------------------------------------------------------------------------------------------------------------------------------------------------------------------------------------------------------------------------------------------------------------------------------------------------------|
| n                                        | 88                                      | 78                                                                                                                                                                                                                                                                                                                                                                                                            |
| Age (median years, IQR)                  | 42 (28-51)                              | 55.5 (40-69)                                                                                                                                                                                                                                                                                                                                                                                                  |
| difference (p-value)                     | p < 0.001                               |                                                                                                                                                                                                                                                                                                                                                                                                               |
| Sex (f/m)                                | f: 26 (29.6%)<br>m: 62 (70.4%)          | f: 32 (41%)<br>m: 46 (59%)                                                                                                                                                                                                                                                                                                                                                                                    |
| difference (p-value)                     | p = 0.0122                              |                                                                                                                                                                                                                                                                                                                                                                                                               |
| Culture-confirmed TB                     | 81                                      | n/a                                                                                                                                                                                                                                                                                                                                                                                                           |
| Culture-negative TB                      | 7                                       | n/a                                                                                                                                                                                                                                                                                                                                                                                                           |
| Alternative diagnosis in non-TB patients | n/a                                     | 14 sarcoidosis<br>13 bacterial pneumonia/NTM pulmonary disease<br>9 connective tissue disease<br>9 persistent infiltrations including previous TB<br>8 idiopathic interstitial pneumonia<br>5 COPD with scarring<br>5 malignancy<br>5 bronchiectasis with peribronchial thickening<br>3 hemoptysis<br>2 alveolitis<br>2 cysts<br>1 atelectasis<br>1 chronic pulmonary aspergillosis<br>1 pulmonary infarction |
| Immunosuppression                        | 2 HIV *<br>1 Adalumimab<br>1 Etanercept | 1 HIV<br>1 Leflunomide<br>1 prednisolon >10mg/day                                                                                                                                                                                                                                                                                                                                                             |
